# Supplementary material
Source: publisher figshare collection journal article supplement (https://tandf.figshare.com/ndownloader/files/15278027)
Supplement: Supplementary file 1 [file 15278027]

# Supplementary

**BBTN-2017-0192.R2 supplementary**

## **Towards the Development of a Bio-based Economy in Europe and India**

Deepak Pant<sup>1\*</sup>, Shilpi Mishra<sup>1</sup>, Abdul-Sattar Nizami<sup>2</sup>, Mohammad Rehan<sup>2</sup>, Rebecca van Leeuwen<sup>3</sup>, Silvia Tabacchioni<sup>4</sup>, Reeta Goel<sup>5</sup>, Priyangshu Sarma<sup>6</sup>, Rob Bakker<sup>7§</sup>, Neeta Sharma<sup>4</sup>, Kees Kwant<sup>3</sup>, Ludo Diels<sup>1</sup>, Kathy Elst<sup>1#</sup>

<sup>1</sup> *Separation and Conversion Technology, Flemish Institute for Technological Research (VITO),  
Boeretang 200, Mol 2400, Belgium*

<sup>2</sup> *Department of Environmental Sciences, Faculty of Meteorology, Environment and Arid Land  
Agriculture, King Abdulaziz University, Jeddah, Saudi Arabia*

<sup>3</sup> *Netherlands Enterprise Agency, Rijksdienst voor Ondernemend Nederland, Slachthuisstraat 71, 6041  
CB, Roermond, Postbus 965, 6040 AZ, Roermond, the Netherlands*

<sup>4</sup> *Department of Sustainable Territorial and Production Systems, Italian National Agency for New  
Technologies, Energy and Sustainable Economic Development (ENEA), Via Anguillarese 301, 00123  
Rome, Italy*

<sup>5</sup> *Department of Microbiology, College of Basic Sciences and Humanities G. B. Pant University of  
Agriculture and Technology Pantnagar India*

<sup>6</sup> *The Energy and Resources Institute, India Habitat Centre, Lodhi Road, New Delhi, India*

<sup>7</sup> *Wageningen UR Food & Biobased Research, P.O. Box 17, 6700 AA, Wageningen, The Netherlands*

<sup>§</sup> *current affiliation: HAS University of Applied Sciences, Den Bosch*

*Corresponding Authors: \*[deepak.pant@vito.be](mailto:deepak.pant@vito.be); #[Kathy.elst@vito.be](mailto:Kathy.elst@vito.be)*

## **Supplementary Information**

In the supplementary information the detailed responses of the survey are given. The results are grouped into the 4 main categories, being, (1) biomass production, (2) by-products and waste, (3) biorefineries and (4) policy, market and products. Per category the number of respondents and responses are given separately for india and EU. In addition, also an overview is given of the results of each potential research and development recommendation belonging to the category under consideration. To facilitate interpretation the recommendations are grouped according to the different subthemes, which are highlighted in yellow. In different tables several views are given of the results, being the overall results, the results per type of organisation and the results per type of sector. The results are always normalized to the number of respondents, indicating thus the percentage of persons that selected a specific recommendation. As all respondents were allowed to select 3 recommendations in each category, the total amounts to approximately 300%.

### **Category 1. Biomass production**

Total India:

- 67 respondents
- 194 responses

Total EU:

- 129 respondents
- 377 responses

*General overview*

| Biomass production                                                                                           |               |            |            |
|--------------------------------------------------------------------------------------------------------------|---------------|------------|------------|
| Answer Options                                                                                               | India-tot (%) | EU-tot (%) | average    |
| <b>Biodiversity</b>                                                                                          | 17.9          | 12.4       | 15.2       |
| Research on the bioprospecting and sustainable exploitation of the rich biodiversity of medicinal and /or    | 17.9          | 12.4       | 15.2       |
| <b>Improved plant production by geno- and phenotyping</b>                                                    | 44.8          | 30.2       | 37.5       |
| Set-up of a genotypic and phenotypic inventory of seed bank material, landraces and wild plants.             | 9.0           | 5.4        | 7.2        |
| Research on the phenotyping of plants to obtain improved crop performance including marginal lands.          | 35.8          | 24.8       | 30.3       |
| <b>Development of new crops (high yielding/high straw, dedicated energy, resilient)</b>                      | 53.7          | 54.3       | 54.0       |
| Development of new crops (and biotechnology crops) allowing agricultural intensification.                    | 7.5           | 10.9       | 9.2        |
| Development of high yielding crop varieties providing by-products of interest (e.g. higher-straw varieties). | 9.0           | 10.1       | 9.5        |
| Development of high yielding dedicated bioenergy crops via optimized agriculture technologies with minimum   | 25.4          | 17.8       | 21.6       |
| Development of more resilient crops (for instance against heat, salinity and draught), such as for instance  | 11.9          | 15.5       | 13.7       |
| <b>Full development of existing energy crops (Jatropha cultivation)</b>                                      | 4.5           | 4.7        | 4.6        |
| Full development of Jatropha cultivation.                                                                    | 4.5           | 4.7        | 4.6        |
| <b>Optimization of agricultural practices through breeding, modelling, monitoring</b>                        | 47.8          | 76.7       | 62.3       |
| Research on breeding and/or agricultural practices to increase/stabilise plant biomass production for food   | 9.0           | 17.8       | 13.4       |
| Research to better understand the range of options for fine-tuning biomass quantity and quality.             | 13.4          | 15.5       | 14.5       |
| Research to provide regional solutions for optimized plant biomass production.                               | 7.5           | 18.6       | 13.0       |
| Demonstrate (appropriate) remote monitoring and control systems (GIS) for plant production in rural areas.   | 6.0           | 4.7        | 5.3        |
| Development of strategies to restore abandoned land with adapted crops and land management.                  | 11.9          | 20.2       | 16.0       |
| <b>Assessing and reducing environmental impact of biomass production</b>                                     | 11.9          | 25.6       | 18.8       |
| Modelling of cropping scenarios and their environmental and socio-economic impact.                           | 11.9          | 4.7        | 8.3        |
| Development of tools/methodologies to reduce the environmental impact of biomass production.                 | 0.0           | 20.9       | 10.5       |
| <b>Forestry</b>                                                                                              | 6.0           | 10.1       | 8.0        |
| Develop/set up (improved) forestry management systems for the sustainable procurement of forestry biomass    | 6.0           | 10.1       | 8.0        |
| <b>Demonstration through pilot scale programs</b>                                                            | 22.4          | 20.9       | 21.7       |
| Demonstration and assessment of intermittent cropping and crop rotation through a pilot scale program.       | 0.0           | 5.4        | 2.7        |
| Pilot demonstration and assessment of the economical sustainability of improved micro- and macro algae       | 22.4          | 15.5       | 18.9       |
| <b>Development/Research on the application of algae</b>                                                      | 80.6          | 57.4       | 69.0       |
| Research on the exploiting the full potential of micro-algae in a biorefinery strategy.                      | 14.9          | 17.1       | 16.0       |
| Development of concepts for closing the nutrient loop for aqueous based plant biomass production.            | 3.0           | 5.4        | 4.2        |
| Research on the phenotyping and selection of algae towards breeding of new organisms.                        | 1.5           | 1.6        | 1.5        |
| Development of algae-based waste water treatment systems.                                                    | 28.4          | 16.3       | 22.3       |
| Development of algae production systems for the sustainable production of renewable energy.                  | 28.4          | 14.7       | 21.5       |
| Development of genetic toolboxes for algae.                                                                  | 4.5           | 2.3        | 3.4        |
| <b>answered question</b>                                                                                     | <b>67</b>     | <b>129</b> | <b>196</b> |

Figure SI.1: General overview of the responses within the category “biomass production”. The recommendations are grouped in their subthemes highlighted in yellow. For each individual recommendation, the percentage of respondents are shown that selected this recommendation. The results are shown for India and EU separately. In addition, also the total result of each subtheme is shown. As each respondent could select three recommendations, the total approximates 300%.

*Detailed answers in function of the type of organization*

| Answer Options                                                                          | India-tot (%) | INDIA-INDUSTRY(%) | INDIA-academic (%) | INDIA-Oth (NGO, Gov. Oth) (%) |
|-----------------------------------------------------------------------------------------|---------------|-------------------|--------------------|-------------------------------|
| <b>Biodiversity</b>                                                                     | 18            | 11                | 19                 | 23                            |
| Research on the bioprospecting and sustainable exploitation of the rich biodiversity of | 18            | 11                | 19                 | 23                            |
| <b>Improved plant production by geno- and phenotyping</b>                               | 45            | 28                | 50                 | 54                            |
| Set-up of a genotypic and phenotypic inventory of seed bank material, landraces and     | 9             | 6                 | 11                 | 8                             |
| Research on the phenotyping of plants to obtain improved crop performance including     | 36            | 22                | 39                 | 46                            |
| <b>Development of new crops (high yielding/high straw, dedicated energy, resilient)</b> | 54            | 72                | 50                 | 38                            |
| Development of new crops (and biotechnology crops) allowing agricultural                | 7             | 11                | 8                  | 0                             |
| Development of high yielding crop varieties providing by-products of interest (e.g.     | 9             | 22                | 3                  | 8                             |
| Development of high yielding dedicated bioenergy crops via optimized agriculture        | 25            | 33                | 28                 | 8                             |
| Development of more resilient crops (for instance against heat, salinity and draught).  | 12            | 6                 | 11                 | 23                            |
| <b>Full development of existing energy crops (Jatropha cultivation)</b>                 | 4             | 11                | 3                  | 0                             |
| Full development of Jatropha cultivation.                                               | 4             | 11                | 3                  | 0                             |
| <b>Optimization of agricultural practices through breeding, modelling, monitoring</b>   | 48            | 61                | 39                 | 54                            |
| Research on breeding and/or agricultural practices to increase/stabilise plant          | 9             | 11                | 6                  | 15                            |
| Research to better understand the range of options for fine-tuning biomass quantity     | 13            | 22                | 14                 | 0                             |
| Research to provide regional solutions for optimized plant biomass production.          | 7             | 17                | 6                  | 0                             |
| Demonstrate (appropriate) remote monitoring and control systems (GIS) for plant         | 6             | 0                 | 6                  | 15                            |
| Development of strategies to restore abandoned land with adapted crops and land         | 12            | 11                | 8                  | 23                            |
| <b>Assessing and reducing environmental impact of biomass production</b>                | 12            | 11                | 11                 | 15                            |
| Modelling of cropping scenarios and their environmental and socio-economic impact.      | 12            | 11                | 11                 | 15                            |
| Development of tools/methodologies to reduce the environmental impact of biomass        | 0             | 0                 | 0                  | 0                             |
| <b>Forestry</b>                                                                         | 6             | 11                | 6                  | 0                             |
| Develop/set up (improved) forestry management systems for the sustainable               | 6             | 11                | 6                  | 0                             |
| <b>Demonstration through pilot scale programs</b>                                       | 22            | 22                | 17                 | 38                            |
| Demonstration and assessment of intermittent cropping and crop rotation through a       | 0             | 0                 | 0                  | 0                             |
| Pilot demonstration and assessment of the economical sustainability of improved         | 22            | 22                | 17                 | 38                            |
| <b>Development/Research on the application of algae</b>                                 | 81            | 61                | 92                 | 77                            |
| Research on the exploiting the full potential of micro-algae in a biorefinery strategy. | 15            | 6                 | 19                 | 15                            |
| Development of concepts for closing the nutrient loop for aqueous based plant           | 3             | 0                 | 3                  | 8                             |
| Research on the phenotyping and selection of algae towards breeding of new              | 1             | 0                 | 3                  | 0                             |
| Development of algae-based waste water treatment systems.                               | 28            | 28                | 31                 | 23                            |
| Development of algae production systems for the sustainable production of               | 28            | 17                | 33                 | 31                            |
| Development of genetic toolboxes for algae.                                             | 4             | 11                | 3                  | 0                             |
| <b>answered question</b>                                                                | <b>67</b>     | <b>18</b>         | <b>36</b>          | <b>13</b>                     |

  

| Answer Options                                                                                               | EU-tot (%) | EU-INDUSTRY(%) | EU-academic (%) | EU-oth (gov, other, NGO) (%) |
|--------------------------------------------------------------------------------------------------------------|------------|----------------|-----------------|------------------------------|
| <b>Biodiversity</b>                                                                                          | 12         | 6              | 18              | 12                           |
| Research on the bioprospecting and sustainable exploitation of the rich biodiversity of medicinal and/or     | 12         | 6              | 18              | 12                           |
| <b>Improved plant production by geno- and phenotyping</b>                                                    | 30         | 25             | 30              | 47                           |
| Set-up of a genotypic and phenotypic inventory of seed bank material, landraces and wild plants.             | 5          | 4              | 7               | 6                            |
| Research on the phenotyping of plants to obtain improved crop performance including marginal lands.          | 25         | 22             | 23              | 41                           |
| <b>Development of new crops (high yielding/high straw, dedicated energy, resilient)</b>                      | 54         | 53             | 51              | 71                           |
| Development of new crops (and biotechnology crops) allowing agricultural intensification.                    | 11         | 8              | 11              | 18                           |
| Development of high yielding crop varieties providing by-products of interest (e.g. higher-straw varieties). | 10         | 10             | 11              | 6                            |
| Development of high yielding dedicated bioenergy crops via optimized agriculture technologies with           | 18         | 18             | 20              | 12                           |
| Development of more resilient crops (for instance against heat, salinity and draught), such as for instance  | 16         | 18             | 8               | 35                           |
| <b>Full development of existing energy crops (Jatropha cultivation)</b>                                      | 5          | 8              | 3               | 0                            |
| Full development of Jatropha cultivation.                                                                    | 5          | 8              | 3               | 0                            |
| <b>Optimization of agricultural practices through breeding, modelling, monitoring</b>                        | 77         | 67             | 87              | 71                           |
| Research on breeding and/or agricultural practices to increase/stabilise plant biomass production for food   | 18         | 14             | 21              | 18                           |
| Research to better understand the range of options for fine-tuning biomass quantity and quality.             | 16         | 16             | 18              | 6                            |
| Research to provide regional solutions for optimized plant biomass production.                               | 19         | 18             | 20              | 18                           |
| Demonstrate (appropriate) remote monitoring and control systems (GIS) for plant production in rural areas.   | 5          | 4              | 7               | 0                            |
| Development of strategies to restore abandoned land with adapted crops and land management.                  | 20         | 16             | 21              | 29                           |
| <b>Assessing and reducing environmental impact of biomass production</b>                                     | 26         | 33             | 21              | 6                            |
| Modelling of cropping scenarios and their environmental and socio-economic impact.                           | 5          | 8              | 3               | 0                            |
| Development of tools/methodologies to reduce the environmental impact of biomass production.                 | 21         | 25             | 18              | 6                            |
| <b>Forestry</b>                                                                                              | 10         | 16             | 5               | 12                           |
| Develop/set up (improved) forestry management systems for the sustainable procurement of forestry            | 10         | 16             | 5               | 12                           |
| <b>Demonstration through pilot scale programs</b>                                                            | 21         | 22             | 21              | 18                           |
| Demonstration and assessment of intermittent cropping and crop rotation through a pilot scale program.       | 5          | 4              | 8               | 0                            |
| Pilot demonstration and assessment of the economical sustainability of improved micro- and macro algae       | 16         | 18             | 13              | 18                           |
| <b>Development/Research on the application of algae</b>                                                      | 57         | 61             | 56              | 53                           |
| Research on the exploiting the full potential of micro-algae in a biorefinery strategy.                      | 17         | 20             | 18              | 6                            |
| Development of concepts for closing the nutrient loop for aqueous based plant biomass production.            | 5          | 4              | 5               | 12                           |
| Research on the phenotyping and selection of algae towards breeding of new organisms.                        | 2          | 2              | 2               | 0                            |
| Development of algae-based waste water treatment systems.                                                    | 16         | 16             | 16              | 18                           |
| Development of algae production systems for the sustainable production of renewable energy.                  | 15         | 20             | 11              | 12                           |
| Development of genetic toolboxes for algae.                                                                  | 2          | 0              | 3               | 6                            |
| <b>answered question</b>                                                                                     | <b>129</b> | <b>51</b>      | <b>61</b>       | <b>17</b>                    |

Figure SI.2: Detailed overview of the responses within the category “biomass production” per type of organization. The recommendations are grouped in subthemes highlighted in yellow. For each individual recommendation as well as type of organization, the percentage of respondents are shown that selected this recommendation. The results are shown in separate tables for India (top) and EU (bottom). The total result of each subtheme is shown. As each respondent could select three recommendations, the total approximates 300%.

*Detailed answers in function of the sector of the organization*

| Answer Options                                                                          | India-tot (%) | INDIA-energy(%) | INDIA-chemistry (%) | INDIA-environmental (%) | INDIA-Agriculture (%) | INDIA-other (%) |
|-----------------------------------------------------------------------------------------|---------------|-----------------|---------------------|-------------------------|-----------------------|-----------------|
| Biodiversity                                                                            | 18            | 28              | 15                  | 15                      | 12                    | 12              |
| Research on the bioprospecting and sustainable exploitation of the rich biodiversity of | 18            | 28              | 15                  | 15                      | 12                    | 12              |
| Improved plant production by geno- and phenotyping                                      | 45            | 28              | 31                  | 46                      | 65                    | 41              |
| Set-up of a genotypic and phenotypic inventory of seed bank material, landraces and     | 9             | 0               | 0                   | 15                      | 24                    | 0               |
| Research on the phenotyping of plants to obtain improved crop performance including     | 36            | 28              | 31                  | 31                      | 41                    | 41              |
| Development of new crops (high yielding/high straw, dedicated energy, resilient)        | 54            | 39              | 85                  | 46                      | 59                    | 35              |
| Development of new crops (and biotechnology crops) allowing agricultural                | 7             | 0               | 31                  | 0                       | 6                     | 6               |
| Development of high yielding crop varieties providing by-products of interest (e.g.     | 9             | 6               | 23                  | 0                       | 6                     | 12              |
| Development of high yielding dedicated bioenergy crops via optimized agriculture        | 25            | 28              | 31                  | 23                      | 24                    | 18              |
| Development of more resilient crops (for instance against heat, salinity and draught).  | 12            | 6               | 0                   | 23                      | 24                    | 0               |
| Full development of existing energy crops (Jatropha cultivation)                        | 4             | 6               | 8                   | 0                       | 6                     | 0               |
| Full development of Jatropha cultivation.                                               | 4             | 6               | 8                   | 0                       | 6                     | 0               |
| Optimization of agricultural practices through breeding, modelling, monitoring          | 48            | 72              | 46                  | 38                      | 47                    | 18              |
| Research on breeding and/or agricultural practices to increase/stabilise plant biomass  | 9             | 11              | 15                  | 0                       | 24                    | 0               |
| Research to better understand the range of options for fine-tuning biomass quantity and | 13            | 33              | 15                  | 0                       | 6                     | 6               |
| Research to provide regional solutions for optimized plant biomass production.          | 7             | 17              | 8                   | 0                       | 6                     | 0               |
| Demonstrate (appropriate) remote monitoring and control systems (GIS) for plant         | 6             | 0               | 0                   | 8                       | 6                     | 12              |
| Development of strategies to restore abandoned land with adapted crops and land         | 12            | 11              | 8                   | 31                      | 6                     | 0               |
| Assessing and reducing environmental impact of biomass production                       | 12            | 17              | 8                   | 31                      | 0                     | 0               |
| Modelling of cropping scenarios and their environmental and socio-economic impact.      | 12            | 17              | 8                   | 31                      | 0                     | 0               |
| Development of tools/methodologies to reduce the environmental impact of biomass        | 0             | 0               | 0                   | 0                       | 0                     | 0               |
| Forestry                                                                                | 6             | 6               | 15                  | 0                       | 6                     | 0               |
| Develop/set up (improved) forestry management systems for the sustainable               | 6             | 6               | 15                  | 0                       | 6                     | 0               |
| Demonstration through pilot scale programs                                              | 22            | 22              | 15                  | 23                      | 18                    | 24              |
| Demonstration and assessment of intermittent cropping and crop rotation through a       | 0             | 0               | 0                   | 0                       | 0                     | 0               |
| Pilot demonstration and assessment of the economical sustainability of improved         | 22            | 22              | 15                  | 23                      | 18                    | 24              |
| Development/Research on the application of algae                                        | 81            | 72              | 77                  | 92                      | 88                    | 71              |
| Research on the exploiting the full potential of micro-algae in a biorefinery strategy. | 15            | 22              | 15                  | 23                      | 0                     | 12              |
| Development of concepts for closing the nutrient loop for aqueous based plant           | 3             | 0               | 0                   | 0                       | 6                     | 6               |
| Research on the phenotyping and selection of algae towards breeding of new              | 1             | 0               | 0                   | 8                       | 0                     | 0               |
| Development of algae-based waste water treatment systems.                               | 28            | 22              | 15                  | 46                      | 35                    | 12              |
| Development of algae production systems for the sustainable production of renewable     | 28            | 22              | 31                  | 15                      | 47                    | 29              |
| Development of genetic toolboxes for algae.                                             | 4             | 6               | 15                  | 0                       | 0                     | 12              |
| <b>answered question</b>                                                                | <b>67</b>     | <b>18</b>       | <b>13</b>           | <b>13</b>               | <b>17</b>             | <b>12</b>       |

  

| Answer Options                                                                          | EU-tot (%) | EU-energy(%) | EU-chemistry (%) | EU-environmental (%) | EU-Agriculture (%) | EU-other (%) |
|-----------------------------------------------------------------------------------------|------------|--------------|------------------|----------------------|--------------------|--------------|
| Biodiversity                                                                            | 12         | 10           | 18               | 22                   | 0                  | 17           |
| Research on the bioprospecting and sustainable exploitation of the rich biodiversity of | 12         | 10           | 18               | 22                   | 0                  | 17           |
| Improved plant production by geno- and phenotyping                                      | 30         | 16           | 26               | 0                    | 57                 | 50           |
| Set-up of a genotypic and phenotypic inventory of seed bank material, landraces and     | 5          | 0            | 5                | 0                    | 21                 | 0            |
| Research on the phenotyping of plants to obtain improved crop performance including     | 25         | 16           | 21               | 0                    | 36                 | 50           |
| Development of new crops (high yielding/high straw, dedicated energy, resilient)        | 54         | 68           | 45               | 78                   | 36                 | 83           |
| Development of new crops (and biotechnology crops) allowing agricultural                | 11         | 16           | 13               | 11                   | 14                 | 11           |
| Development of high yielding crop varieties providing by-products of interest (e.g.     | 10         | 19           | 8                | 0                    | 7                  | 17           |
| Development of high yielding dedicated bioenergy crops via optimized agriculture        | 18         | 19           | 11               | 33                   | 14                 | 17           |
| Development of more resilient crops (for instance against heat, salinity and draught).  | 16         | 13           | 13               | 33                   | 0                  | 39           |
| Full development of existing energy crops (Jatropha cultivation)                        | 5          | 6            | 5                | 22                   | 0                  | 6            |
| Full development of Jatropha cultivation.                                               | 5          | 6            | 5                | 22                   | 0                  | 6            |
| Optimization of agricultural practices through breeding, modelling, monitoring          | 77         | 68           | 89               | 33                   | 100                | 56           |
| Research on breeding and/or agricultural practices to increase/stabilise plant biomass  | 18         | 10           | 21               | 0                    | 36                 | 11           |
| Research to better understand the range of options for fine-tuning biomass quantity and | 16         | 3            | 21               | 11                   | 21                 | 11           |
| Research to provide regional solutions for optimized plant biomass production.          | 19         | 19           | 21               | 11                   | 14                 | 17           |
| Demonstrate (appropriate) remote monitoring and control systems (GIS) for plant         | 5          | 13           | 0                | 11                   | 7                  | 0            |
| Development of strategies to restore abandoned land with adapted crops and land         | 20         | 23           | 26               | 0                    | 21                 | 17           |
| Assessing and reducing environmental impact of biomass production                       | 26         | 19           | 26               | 33                   | 29                 | 28           |
| Modelling of cropping scenarios and their environmental and socio-economic impact.      | 5          | 3            | 3                | 11                   | 14                 | 11           |
| Development of tools/methodologies to reduce the environmental impact of biomass        | 21         | 16           | 24               | 22                   | 14                 | 17           |
| Forestry                                                                                | 10         | 19           | 5                | 11                   | 0                  | 11           |
| Develop/set up (improved) forestry management systems for the sustainable               | 10         | 19           | 5                | 11                   | 0                  | 11           |
| Demonstration through pilot scale programs                                              | 21         | 26           | 16               | 0                    | 36                 | 11           |
| Demonstration and assessment of intermittent cropping and crop rotation through a       | 5          | 6            | 5                | 0                    | 14                 | 6            |
| Pilot demonstration and assessment of the economical sustainability of improved         | 16         | 19           | 11               | 0                    | 21                 | 6            |
| Development/Research on the application of algae                                        | 57         | 65           | 55               | 78                   | 43                 | 50           |
| Research on the exploiting the full potential of micro-algae in a biorefinery strategy. | 17         | 16           | 32               | 0                    | 7                  | 17           |
| Development of concepts for closing the nutrient loop for aqueous based plant           | 5          | 6            | 5                | 0                    | 7                  | 0            |
| Research on the phenotyping and selection of algae towards breeding of new              | 2          | 0            | 0                | 0                    | 7                  | 0            |
| Development of algae-based waste water treatment systems.                               | 16         | 19           | 11               | 56                   | 14                 | 17           |
| Development of algae production systems for the sustainable production of renewable     | 15         | 23           | 5                | 22                   | 7                  | 11           |
| Development of genetic toolboxes for algae.                                             | 2          | 0            | 3                | 0                    | 0                  | 6            |
| <b>answered question</b>                                                                | <b>129</b> | <b>31</b>    | <b>38</b>        | <b>9</b>             | <b>14</b>          | <b>18</b>    |

Figure SI.3: Detailed overview of the responses within the category “biomass production” per sector of organization. The recommendations are grouped in subthemes highlighted in yellow. For each individual recommendation as well as the sector of the organization, the percentage of respondents are shown that selected this recommendation. The results are shown in separate tables for India (top) and EU (bottom). The total result of each subtheme is shown. As each respondent could select three recommendations, the total approximates 300%.

## 2. Waste and by-products

Total India:

- 67 respondents
- 187 responses

Total EU:

- 130 respondents
- 374 responses

*Overall comparison:*

| Answer Options                                                         | India-tot (%) | EU-tot (%) | average    |
|------------------------------------------------------------------------|---------------|------------|------------|
| survey                                                                 | 46.3%         | 58.5%      | 52.4%      |
| Set up of a survey to assess the amount and type of waste dumped at    | 3.0%          | 10.8%      | 6.9%       |
| Assessment of the composition and the generation of MSW and the        | 17.9%         | 17.7%      | 17.8%      |
| Set up of a survey of the generation and available agricultural and    | 25.4%         | 30.0%      | 27.7%      |
| Improved collection and utilization of wastes                          | 65.7%         | 68.5%      | 67.1%      |
| Development of technologies/methods to harvest, collect and use        | 38.8%         | 38.5%      | 38.6%      |
| Research to the better and maximum utilization of biowaste.            | 26.9%         | 30.0%      | 28.4%      |
| Development of new Technologies to convert existing (solid) waste      | 77.6%         | 72.3%      | 75.0%      |
| Development of technological routes to apply on existing agro-forestry | 26.9%         | 30.0%      | 28.4%      |
| Development of technological routes to apply on existing municipal     | 29.9%         | 22.3%      | 26.1%      |
| Development of technological routes to apply on existing industrial    | 20.9%         | 20.0%      | 20.4%      |
| Research on wastewater treatment / bioremediation                      | 38.8%         | 16.2%      | 27.5%      |
| Research on plants suitable for waste treatment and conversion.        | 13.4%         | 7.7%       | 10.6%      |
| Research on bioremediation, including bioremediation in sewage         | 25.4%         | 8.5%       | 16.9%      |
| Conversion of CO2                                                      | 26.9%         | 28.5%      | 27.7%      |
| Development of new processes converting CO2 in bioenergy or            | 26.9%         | 28.5%      | 27.7%      |
| Development of routes to convert wastes to a platform system for       | 23.9%         | 43.8%      | 33.9%      |
| Development of improved and safer conversion processes of wastes       | 10.4%         | 22.3%      | 16.4%      |
| Development of new routes for waste valorisation biobased products     | 6.0%          | 7.7%       | 6.8%       |
| Developing new routes for waste valorisation to biobased products and  | 7.5%          | 13.8%      | 10.7%      |
| <b>answers answered question</b>                                       | <b>67</b>     | <b>130</b> | <b>197</b> |

Figure SI.4: General overview of the responses within the category “Waste and by-products”.

The recommendations are grouped in their subthemes highlighted in yellow. For each individual recommendation, the percentage of respondents are shown that selected this recommendation. The results are shown for India and EU separately. In addition, also the total result of each subtheme is shown. As each respondent could select three recommendations, the total approximates 300%.

*Detailed answers in function of the type of organisation:*

| Answer Options                                                                                 | India-tot (%) | INDIA-INDUSTRY (%) | INDIA-academic (%) | INDIA-Other (NGO, Gov. Oth) (%) |
|------------------------------------------------------------------------------------------------|---------------|--------------------|--------------------|---------------------------------|
| <b>survey</b>                                                                                  | 46.3%         | 52.6%              | 48.6%              | 30.8%                           |
| Set up of a survey to assess the amount and type of waste dumped at landfills.                 | 3.0%          | 5.3%               | 2.9%               | 0.0%                            |
| Assessment of the composition and the generation of MSW and the development of new             | 17.9%         | 36.8%              | 11.4%              | 7.7%                            |
| Set up of a survey of the generation and available agricultural and processing by-products     | 25.4%         | 10.5%              | 34.3%              | 23.1%                           |
| <b>Improved collection and utilization of wastes</b>                                           | 65.7%         | 73.7%              | 68.6%              | 46.2%                           |
| Development of technologies/methods to harvest, collect and use agricultural by-products,      | 38.8%         | 47.4%              | 34.3%              | 38.5%                           |
| Research to the better and maximum utilization of biowaste.                                    | 26.9%         | 26.3%              | 34.3%              | 7.7%                            |
| <b>Development of new Technologies to convert existing (solid) waste</b>                       | 77.6%         | 68.4%              | 77.1%              | 92.3%                           |
| Development of technological routes to apply on existing agro-forestry waste, including        | 26.9%         | 21.1%              | 31.4%              | 23.1%                           |
| Development of technological routes to apply on existing municipal waste as feedstock for      | 29.9%         | 31.6%              | 22.9%              | 46.2%                           |
| Development of technological routes to apply on existing industrial waste as feedstock for     | 20.9%         | 15.8%              | 22.9%              | 23.1%                           |
| <b>Research on wastewater treatment / bioremediation</b>                                       | 38.8%         | 21.1%              | 37.1%              | 69.2%                           |
| Research on plants suitable for waste treatment and conversion.                                | 13.4%         | 10.5%              | 11.4%              | 23.1%                           |
| Research on bioremediation, including bioremediation in sewage systems, and                    | 25.4%         | 10.5%              | 25.7%              | 46.2%                           |
| <b>Conversion of CO2</b>                                                                       | 26.9%         | 36.8%              | 25.7%              | 15.4%                           |
| Development of new processes converting CO2 in bioenergy or biobased products.                 | 26.9%         | 36.8%              | 25.7%              | 15.4%                           |
| <b>Development of routes to convert wastes to a platform system for bioenergy and biobased</b> | 23.9%         | 36.8%              | 20.0%              | 15.4%                           |
| Development of improved and safer conversion processes of wastes (including pretreatment       | 10.4%         | 21.1%              | 5.7%               | 7.7%                            |
| Development of new routes for waste valorisation biobased products through Volatile Fatty      | 6.0%          | 5.3%               | 8.6%               | 0.0%                            |
| Developing new routes for waste valorisation to biobased products and fuels using synthetic    | 7.5%          | 10.5%              | 5.7%               | 7.7%                            |
| <b>answered question</b>                                                                       | <b>67</b>     | <b>19</b>          | <b>35</b>          | <b>13</b>                       |

  

| Answer Options                                                                                 | EU-tot (%) | EU-INDUSTRY (%) | EU-academic (%) | EU-Other (NGO, Gov. Oth) (%) |
|------------------------------------------------------------------------------------------------|------------|-----------------|-----------------|------------------------------|
| <b>survey</b>                                                                                  | 58.5%      | 66.0%           | 52.4%           | 58.8%                        |
| Set up of a survey to assess the amount and type of waste dumped at landfills.                 | 10.8%      | 16.0%           | 7.9%            | 5.9%                         |
| Assessment of the composition and the generation of MSW and the development of new             | 17.7%      | 16.0%           | 17.5%           | 23.5%                        |
| Set up of a survey of the generation and available agricultural and processing by-products     | 30.0%      | 34.0%           | 27.0%           | 29.4%                        |
| <b>Improved collection and utilization of wastes</b>                                           | 68.5%      | 72.0%           | 66.7%           | 64.7%                        |
| Development of technologies/methods to harvest, collect and use agricultural by-products,      | 38.5%      | 42.0%           | 38.1%           | 29.4%                        |
| Research to the better and maximum utilization of biowaste.                                    | 30.0%      | 30.0%           | 28.6%           | 35.3%                        |
| <b>Development of new Technologies to convert existing (solid) waste</b>                       | 72.3%      | 68.0%           | 74.6%           | 88.2%                        |
| Development of technological routes to apply on existing agro-forestry waste, including        | 30.0%      | 18.0%           | 38.1%           | 29.4%                        |
| Development of technological routes to apply on existing municipal waste as feedstock for      | 22.3%      | 30.0%           | 15.9%           | 35.3%                        |
| Development of technological routes to apply on existing industrial waste as feedstock for     | 20.0%      | 20.0%           | 20.6%           | 23.5%                        |
| <b>Research on wastewater treatment / bioremediation</b>                                       | 16.2%      | 10.0%           | 20.6%           | 17.6%                        |
| Research on plants suitable for waste treatment and conversion.                                | 7.7%       | 4.0%            | 11.1%           | 5.9%                         |
| Research on bioremediation, including bioremediation in sewage systems, and                    | 8.5%       | 6.0%            | 9.5%            | 11.8%                        |
| <b>Conversion of CO2</b>                                                                       | 28.5%      | 36.0%           | 22.2%           | 29.4%                        |
| Development of new processes converting CO2 in bioenergy or biobased products.                 | 28.5%      | 36.0%           | 22.2%           | 29.4%                        |
| <b>Development of routes to convert wastes to a platform system for bioenergy and biobased</b> | 43.8%      | 38.0%           | 47.6%           | 47.1%                        |
| Development of improved and safer conversion processes of wastes (including                    | 22.3%      | 22.0%           | 22.2%           | 23.5%                        |
| Development of new routes for waste valorisation biobased products through Volatile Fatty      | 7.7%       | 6.0%            | 11.1%           | 0.0%                         |
| Developing new routes for waste valorisation to biobased products and fuels using              | 13.8%      | 10.0%           | 14.3%           | 23.5%                        |
| <b>answered question</b>                                                                       | <b>130</b> | <b>50</b>       | <b>63</b>       | <b>17</b>                    |

Figure SI.5: Detailed overview of the responses within the category “Waste and by-products” per type of organization. The recommendations are grouped in subthemes highlighted in yellow. For each individual recommendation as well as type of organization, the percentage of respondents are shown that selected this recommendation. The results are shown in separate tables for India (top) and EU (bottom). The total result of each subtheme is shown. As each respondent could select three recommendations, the total approximates 300%.



### 3. Biorefinery

Total India:

- 65 respondents
- 190 responses

Total EU:

- 129 respondents
- 372 responses

*Overall comparison:*

| Answer Options                                                                         | INDIA-tot (%) | EU-tot (%) | average    |
|----------------------------------------------------------------------------------------|---------------|------------|------------|
| <b>Demonstration</b>                                                                   | 50.8%         | 47.3%      | 49.0%      |
| Set up of demo-biorefinery systems (low volume-high value/high volume-                 | 15.4%         | 8.5%       | 12.0%      |
| Set up of integrated demo biorefinery systems (ethanol, sugar, power, ...).            | 24.6%         | 20.9%      | 22.8%      |
| Demonstration of small decentralized biomass densification                             | 10.8%         | 17.8%      | 14.3%      |
| <b>Smart equipment</b>                                                                 | 12.3%         | 10.9%      | 11.6%      |
| Development of smart processing equipment.                                             | 12.3%         | 10.9%      | 11.6%      |
| <b>New biorefinery systems</b>                                                         | 26.2%         | 23.3%      | 24.7%      |
| Development of new routes for producing biochemicals based on                          | 10.8%         | 8.5%       | 9.6%       |
| Development of new routes for producing biochemicals from Protein-                     | 10.8%         | 7.8%       | 9.3%       |
| Development of a biorefinery leading to inorganics as silica, K, Ca,                   | 4.6%          | 7.0%       | 5.8%       |
| <b>Thermochemical systems</b>                                                          | 23.1%         | 31.0%      | 27.0%      |
| Creating more efficient approaches by combining thermochemical and                     | 13.8%         | 13.2%      | 13.5%      |
| Development of a pyrolysis oil platform for producing advanced biofuels                | 7.7%          | 7.0%       | 7.3%       |
| Development of a combined process based on pyrolysis and                               | 1.5%          | 10.9%      | 6.2%       |
| <b>Biorefinery based on lignocellulosic resources towards fuels and</b>                | 92.3%         | 85.3%      | 88.8%      |
| Development and utilization of smart enzyme systems for simultaneously                 | 20.0%         | 12.4%      | 16.2%      |
| Development, utilization and economical assessment of more active,                     | 10.8%         | 9.3%       | 10.0%      |
| Research and development of yeasts that can produce cellulases and                     | 16.9%         | 9.3%       | 13.1%      |
| Development of conversion methodologies for lignin towards                             | 10.8%         | 11.6%      | 11.2%      |
| Research and demonstration on process intensification to achieve more                  | 16.9%         | 20.2%      | 18.5%      |
| Development of biorefinery systems based on fast growing and/or easily                 | 16.9%         | 22.5%      | 19.7%      |
| <b>Biorefinery based on oils towards fuels and chemicals</b>                           | 4.6%          | 10.9%      | 7.7%       |
| New methodologies for producing and refining non-food plant oils                       | 4.6%          | 7.0%       | 5.8%       |
| Development of a full oleochemistry platform, including phytosterols,                  | 0.0%          | 3.9%       | 1.9%       |
| <b>Biorefinery based on gases (CO<sub>2</sub>/methane) towards fuels and chemicals</b> | 6.2%          | 4.7%       | 5.4%       |
| Research on fermentations using gas as a feedstock to produce biofuels                 | 6.2%          | 4.7%       | 5.4%       |
| <b>Anaerobic digestion</b>                                                             | 76.9%         | 75.2%      | 76.1%      |
| Research and developments to improve the overall efficiencies and                      | 9.2%          | 8.5%       | 8.9%       |
| Development of strategies for multi-feedstock anaerobic digestion of                   | 24.6%         | 14.7%      | 19.7%      |
| Development of a multiple-product approach for anaerobic digestion                     | 7.7%          | 10.9%      | 9.3%       |
| Development of easy-to-operate and inexpensive anaerobic digesters                     | 9.2%          | 14.0%      | 11.6%      |
| Research on the microbiology of AD for different feedstocks, including                 | 6.2%          | 2.3%       | 4.2%       |
| Research on the required upgrading, storage and logistics of biogas in                 | 3.1%          | 5.4%       | 4.3%       |
| Research on the use of digestate such as fertilizer substitute or fibres.              | 6.2%          | 10.9%      | 8.5%       |
| Research on the pre-treatment of biomass for gasification.                             | 10.8%         | 8.5%       | 9.6%       |
| <b>answered question</b>                                                               | <b>65</b>     | <b>129</b> | <b>194</b> |

Figure SI.6: General overview of the responses within the category “biorefineries”. The recommendations are grouped in their subthemes highlighted in yellow. For each individual recommendation, the percentage of respondents are shown that selected this recommendation. The results are shown for India and EU separately. In addition, also the total result of each subtheme is shown. As each respondent could select three recommendations, the total approximates 300%.



## Detailed answers in function of the type of organisation:

| Answer Options                                                                                              | INDIA-tot (%) | INDIA-INDUSTRY(%) | INDIA-academic | INDIA-Other (NGO, Gov.) |
|-------------------------------------------------------------------------------------------------------------|---------------|-------------------|----------------|-------------------------|
| <b>Demonstration</b>                                                                                        | 50.8%         | 52.6%             | 42.4%          | 69.2%                   |
| Set up of demo-biorefinery systems (low volume-high value/high volume-low value).                           | 15.4%         | 10.5%             | 12.1%          | 30.8%                   |
| Set up of integrated demo biorefinery systems (ethanol, sugar, power, ...).                                 | 24.6%         | 36.8%             | 15.2%          | 30.8%                   |
| Demonstration of small decentralized biomass densification programmes.                                      | 10.8%         | 5.3%              | 15.2%          | 7.7%                    |
| <b>Smart equipment</b>                                                                                      | 12.3%         | 5.3%              | 21.2%          | 0.0%                    |
| Development of smart processing equipment.                                                                  | 12.3%         | 5.3%              | 21.2%          | 0.0%                    |
| <b>New biorefinery systems</b>                                                                              | 26.2%         | 21.1%             | 21.2%          | 46.2%                   |
| Development of new routes for producing biochemicals based on Furfural-based chemistry.                     | 10.8%         | 5.3%              | 12.1%          | 15.4%                   |
| Development of new routes for producing biochemicals from Protein-based resources.                          | 10.8%         | 15.8%             | 3.0%           | 23.1%                   |
| Development of a biorefinery leading to inorganics as silica, K, Ca, nutrients, ...                         | 4.6%          | 0.0%              | 6.1%           | 7.7%                    |
| <b>Thermochemical systems</b>                                                                               | 23.1%         | 21.1%             | 24.2%          | 23.1%                   |
| Creating more efficient approaches by combining thermochemical and biochemical conversion pathways          | 13.8%         | 10.5%             | 15.2%          | 15.4%                   |
| Development of a pyrolysis oil platform for producing advanced biofuels and biochemicals.                   | 7.7%          | 10.5%             | 9.1%           | 0.0%                    |
| Development of a combined process based on pyrolysis and gasification for producing advanced                | 1.5%          | 0.0%              | 0.0%           | 7.7%                    |
| <b>Biorefinery based on lignocellulosic resources towards fuels and chemicals</b>                           | 92.3%         | 100.0%            | 84.8%          | 53.8%                   |
| Development and utilization of smart enzyme systems for simultaneously conversion of cellulose and          | 20.0%         | 26.3%             | 24.2%          | 0.0%                    |
| Development, utilization and economical assessment of more active, cheaper enzymes for hydrolysis of        | 10.8%         | 5.3%              | 12.1%          | 15.4%                   |
| Research and development of yeasts that can produce cellulases and convert sugars in a range of             | 16.9%         | 15.8%             | 21.2%          | 7.7%                    |
| Development of conversion methodologies for lignin towards bioaromatics through biological, chemical        | 10.8%         | 15.8%             | 3.0%           | 23.1%                   |
| Research and demonstration on process intensification to achieve more cost-competitive lignocellulosic      | 16.9%         | 15.8%             | 24.2%          | 0.0%                    |
| Development of biorefinery systems based on fast growing and/or easily available biomass resources          | 16.9%         | 21.1%             | 0.0%           | 7.7%                    |
| <b>Biorefinery based on oils towards fuels and chemicals</b>                                                | 4.6%          | 0.0%              | 6.1%           | 7.7%                    |
| New methodologies for producing and refining non-food plant oils (aviation sector).                         | 4.6%          | 0.0%              | 6.1%           | 7.7%                    |
| Development of a full oleochemistry platform, including phytosterols, tocopherols, carotenoids sterols etc. | 0.0%          | 0.0%              | 0.0%           | 0.0%                    |
| <b>Biorefinery based on gases (CO2/methane) towards fuels and chemicals</b>                                 | 6.2%          | 21.1%             | 0.0%           | 0.0%                    |
| Research on fermentations using gas as a feedstock to produce biofuels and biochemical.                     | 6.2%          | 21.1%             | 0.0%           | 0.0%                    |
| <b>Anaerobic digestion</b>                                                                                  | 76.9%         | 73.7%             | 75.8%          | 84.6%                   |
| Research and developments to improve the overall efficiencies and reduction of costs of anaerobic           | 9.2%          | 21.1%             | 3.0%           | 7.7%                    |
| Development of strategies for multi-feedstock anaerobic digestion of various types of waste, including      | 24.6%         | 31.6%             | 24.2%          | 15.4%                   |
| Development of a multiple-product approach for anaerobic digestion (hydrogen, VFA, digestate) for           | 7.7%          | 5.3%              | 6.1%           | 15.4%                   |
| Development of easy-to-operate and inexpensive anaerobic digesters and their application                    | 9.2%          | 5.3%              | 9.1%           | 15.4%                   |
| Research on the microbiology of AD for different feedstocks, including pre-treatment (e.g. separate         | 6.2%          | 0.0%              | 12.1%          | 0.0%                    |
| Research on the required upgrading, storage and logistics of biogas in relation to its application, such as | 3.1%          | 0.0%              | 3.0%           | 7.7%                    |
| Research on the use of digestate such as fertilizer substitute or fibres.                                   | 6.2%          | 5.3%              | 3.0%           | 15.4%                   |
| Research on the pre-treatment of biomass for gasification.                                                  | 10.8%         | 5.3%              | 15.2%          | 7.7%                    |
| <b>answered question</b>                                                                                    | <b>65</b>     | <b>19</b>         | <b>33</b>      | <b>13</b>               |

| Answer Options                                                      | EU-tot (%) | EU-INDUSTRY (%) | EU-academic (%) | EU-Other (NGO, Gov, Oth) (%) |
|---------------------------------------------------------------------|------------|-----------------|-----------------|------------------------------|
| <b>Demonstration</b>                                                | 47.3%      | 51.0%           | 41.9%           | 55.6%                        |
| Set up of demo-biorefinery systems (low volume-high                 | 8.5%       | 8.2%            | 4.8%            | 22.2%                        |
| Set up of integrated demo biorefinery systems (ethanol, sugar,      | 20.9%      | 20.4%           | 22.6%           | 16.7%                        |
| Demonstration of small decentralized biomass densification          | 17.8%      | 22.4%           | 14.5%           | 16.7%                        |
| <b>Smart equipment</b>                                              | 10.9%      | 12.2%           | 12.9%           | 0.0%                         |
| Development of smart processing equipment                           | 10.9%      | 12.2%           | 12.9%           | 0.0%                         |
| <b>New biorefinery systems</b>                                      | 23.3%      | 32.7%           | 16.1%           | 22.2%                        |
| Development of new routes for producing biochemicals based          | 8.5%       | 8.2%            | 8.1%            | 11.1%                        |
| Development of new routes for producing biochemicals from           | 7.8%       | 8.2%            | 8.1%            | 5.6%                         |
| Development of a biorefinery leading to inorganics as silica, K,    | 7.0%       | 16.3%           | 0.0%            | 5.6%                         |
| <b>Thermochemical systems</b>                                       | 31.0%      | 36.7%           | 30.6%           | 16.7%                        |
| Creating more efficient approaches by combining                     | 13.2%      | 20.4%           | 8.1%            | 11.1%                        |
| Development of a pyrolysis oil platform for producing advanced      | 7.0%       | 8.2%            | 8.1%            | 0.0%                         |
| Development of a combined process based on pyrolysis and            | 10.9%      | 8.2%            | 14.5%           | 5.6%                         |
| <b>Biorefinery based on lignocellulosic resources towards fuels</b> | 85.3%      | 61.2%           | 104.8%          | 83.3%                        |
| Development and utilization of smart enzyme systems for             | 12.4%      | 8.2%            | 14.5%           | 16.7%                        |
| Development, utilization and economical assessment of more          | 9.3%       | 6.1%            | 12.9%           | 5.6%                         |
| Research and development of yeasts that can produce                 | 9.3%       | 14.3%           | 6.5%            | 5.6%                         |
| Development of conversion methodologies for lignin towards          | 11.6%      | 6.1%            | 16.1%           | 11.1%                        |
| Research and demonstration on process intensification to            | 20.2%      | 14.3%           | 24.2%           | 22.2%                        |
| Development of biorefinery systems based on fast growing            | 22.5%      | 12.2%           | 30.6%           | 22.2%                        |
| <b>Biorefinery based on oils towards fuels and chemicals</b>        | 10.9%      | 12.2%           | 8.1%            | 16.7%                        |
| New methodologies for producing and refining non-food plant         | 7.0%       | 6.1%            | 6.5%            | 11.1%                        |
| Development of a full oleochemistry platform, including             | 3.9%       | 6.1%            | 1.6%            | 5.6%                         |
| <b>Biorefinery based on gases (CO2/methane) towards fuels and</b>   | 4.7%       | 6.1%            | 1.6%            | 11.1%                        |
| Research on fermentations using gas as a feedstock to               | 4.7%       | 6.1%            | 1.6%            | 11.1%                        |
| <b>Anaerobic digestion</b>                                          | 75.2%      | 69.4%           | 75.8%           | 88.9%                        |
| Research and developments to improve the overall efficiencies       | 8.5%       | 4.1%            | 11.3%           | 11.1%                        |
| Development of strategies for multi-feedstock anaerobic             | 14.7%      | 20.4%           | 11.3%           | 11.1%                        |
| Development of a multiple-product approach for anaerobic            | 10.9%      | 10.2%           | 12.9%           | 5.6%                         |
| Development of easy-to-operate and inexpensive anaerobic            | 14.0%      | 16.3%           | 9.7%            | 22.2%                        |
| Research on the microbiology of AD for different feedstocks,        | 2.3%       | 0.0%            | 4.8%            | 0.0%                         |
| Research on the required upgrading, storage and logistics of        | 5.4%       | 4.1%            | 6.5%            | 5.6%                         |
| Research on the use of digestate such as fertilizer substitute or   | 10.9%      | 4.1%            | 14.5%           | 16.7%                        |
| Research on the pre-treatment of biomass for gasification.          | 8.5%       | 10.2%           | 4.8%            | 16.7%                        |
| <b>answered question</b>                                            | <b>129</b> | <b>49</b>       | <b>62</b>       | <b>18</b>                    |

Figure SI.7: Detailed overview of the responses within the category “Biorefineries” per type of organization. The recommendations are grouped in subthemes highlighted in yellow. For each individual recommendation as well as type of organization, the percentage of respondents are shown that selected this recommendation. The results are shown in separate tables for India (top) and EU (bottom). The total result of each subtheme is shown. As each respondent could select three recommendations, the total approximates 300%.

#### 4. Policy, Market and Products

Total India:

- 64 respondents
- 187 responses

Total EU:

- 130 respondents
- 374 responses

*Overall comparison:*

| Answer Options                                                                    | INDIA-total | EU-total   | Average    |
|-----------------------------------------------------------------------------------|-------------|------------|------------|
| Assessment of the present agricultural and biological waste categories that can   | 48.4%       | 22.5%      | 35.5%      |
| Reduction of pre-and post-harvest losses and improved supply chain                | 17.2%       | 19.4%      | 18.3%      |
| Stimulation of the zero waste production systems.                                 | 12.5%       | 31.8%      | 22.1%      |
| Capacity building of farmers both at EU and India levels. In particular providing | 15.6%       | 14.7%      | 15.2%      |
| Improved LCA methods.                                                             | 18.8%       | 18.6%      | 18.7%      |
| Agreement on the sustainable production and the use of biomass for the            | 31.3%       | 32.6%      | 31.9%      |
| Public procurement of biobased products.                                          | 15.6%       | 13.2%      | 14.4%      |
| Develop standards for biobased products.                                          | 15.6%       | 24.0%      | 19.8%      |
| Have agreement on GHG reduction performance of biobased products and              | 9.4%        | 15.5%      | 12.4%      |
| Joint EU-IN study on markets; biobased polymers, aromats, fibres and other        | 18.8%       | 13.2%      | 16.0%      |
| Research into development of performance criteria of biobased products, GHG       | 15.6%       | 14.0%      | 14.8%      |
| Research for creating a level playing field for biobased products and energy      | 4.7%        | 10.1%      | 7.4%       |
| Research into sustainability limitations and opportunities of biomass production  | 21.9%       | 18.6%      | 20.2%      |
| Create awareness on ecology, environment, biobased economy at primary and         | 25.0%       | 24.8%      | 24.9%      |
| Provide training and improve skills in agriculture and industry.                  | 21.9%       | 20.9%      | 21.4%      |
| <b>answered question</b>                                                          | <b>64</b>   | <b>118</b> | <b>182</b> |

Figure SI.8: General overview of the responses within the category “Policy, market and products”. The recommendations are grouped in their subthemes highlighted in yellow. For each individual recommendation, the percentage of respondents are shown that selected this recommendation. The results are shown for India and EU separately. In addition also the total result of each subtheme is shown. As each respondent could select three recommendations, the total approximates 300%.

#### 5. Comparison of responses from the EU and India

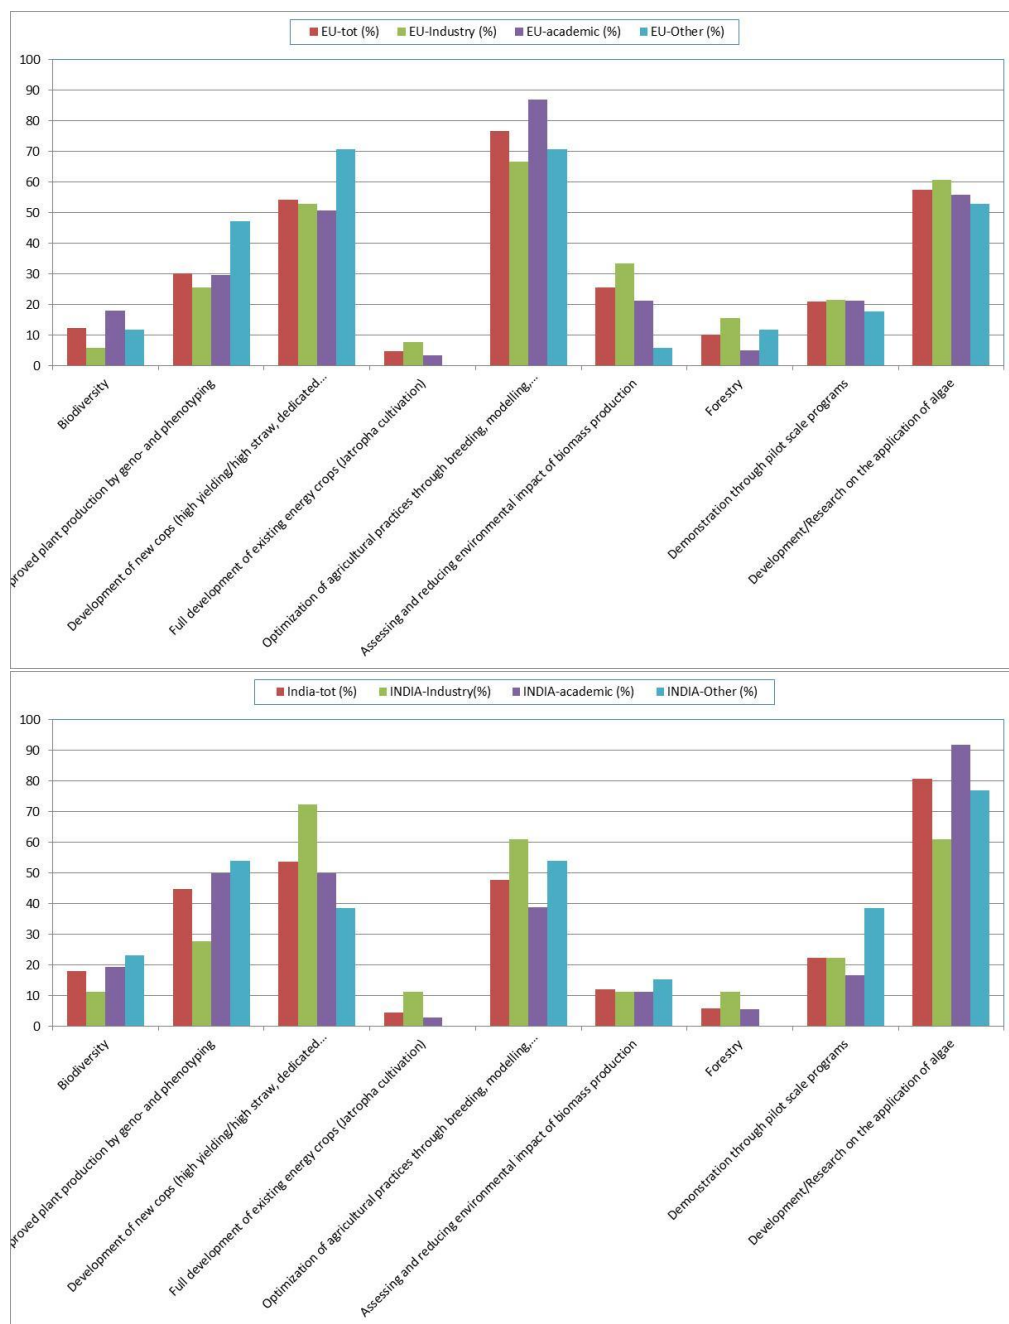

Figure SI.9: Comparison of responses to feedstock related survey questions by industry, academic and other sectors in EU (top) and India (bottom).

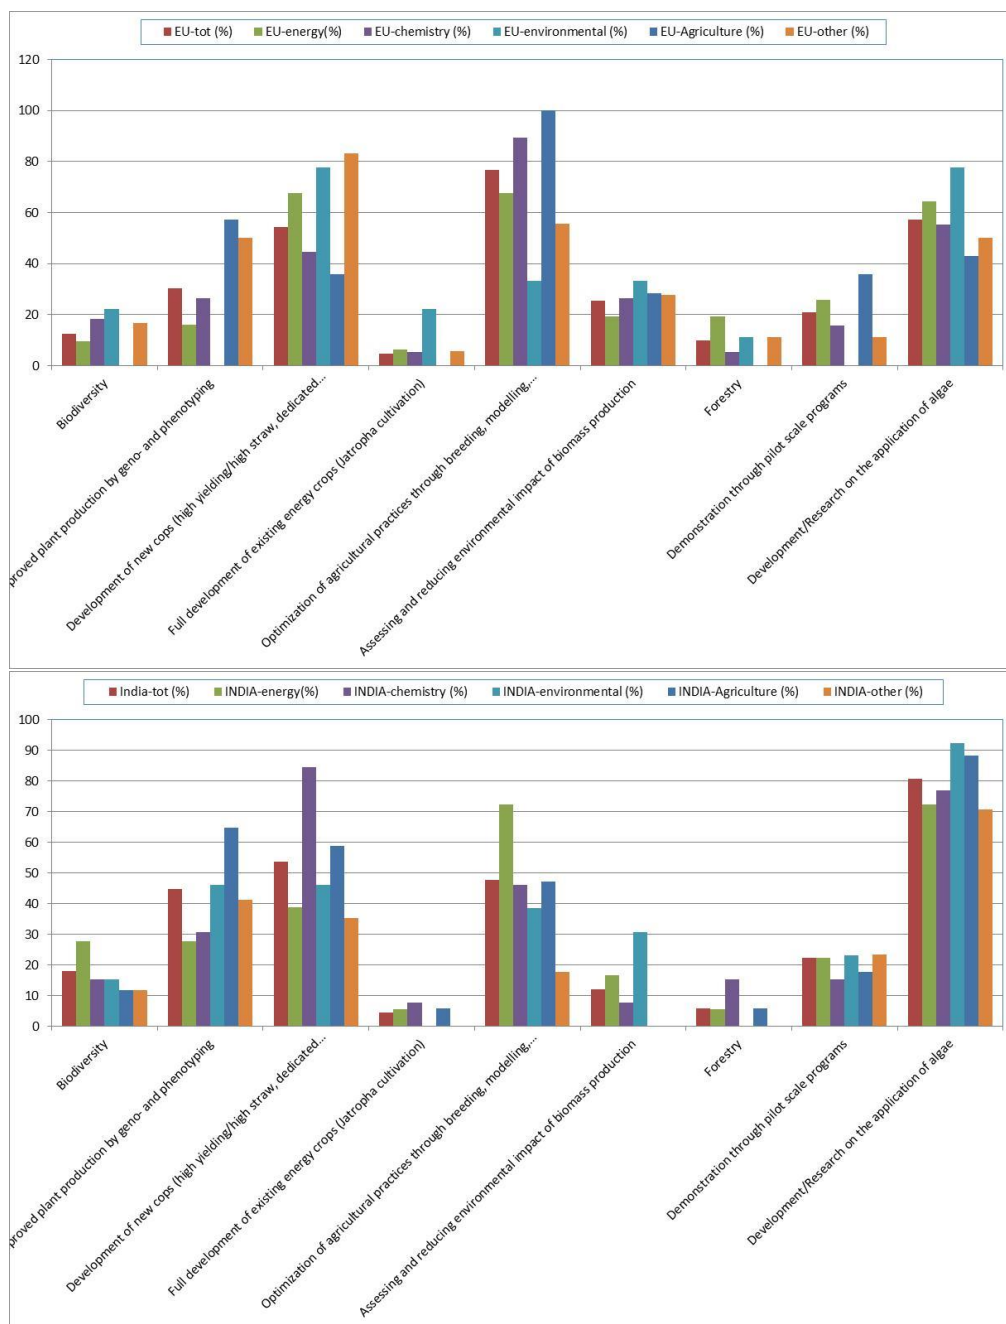

Figure SI.10: Comparison of responses to feedstock related survey questions by different organizations in EU (top) and India (bottom).

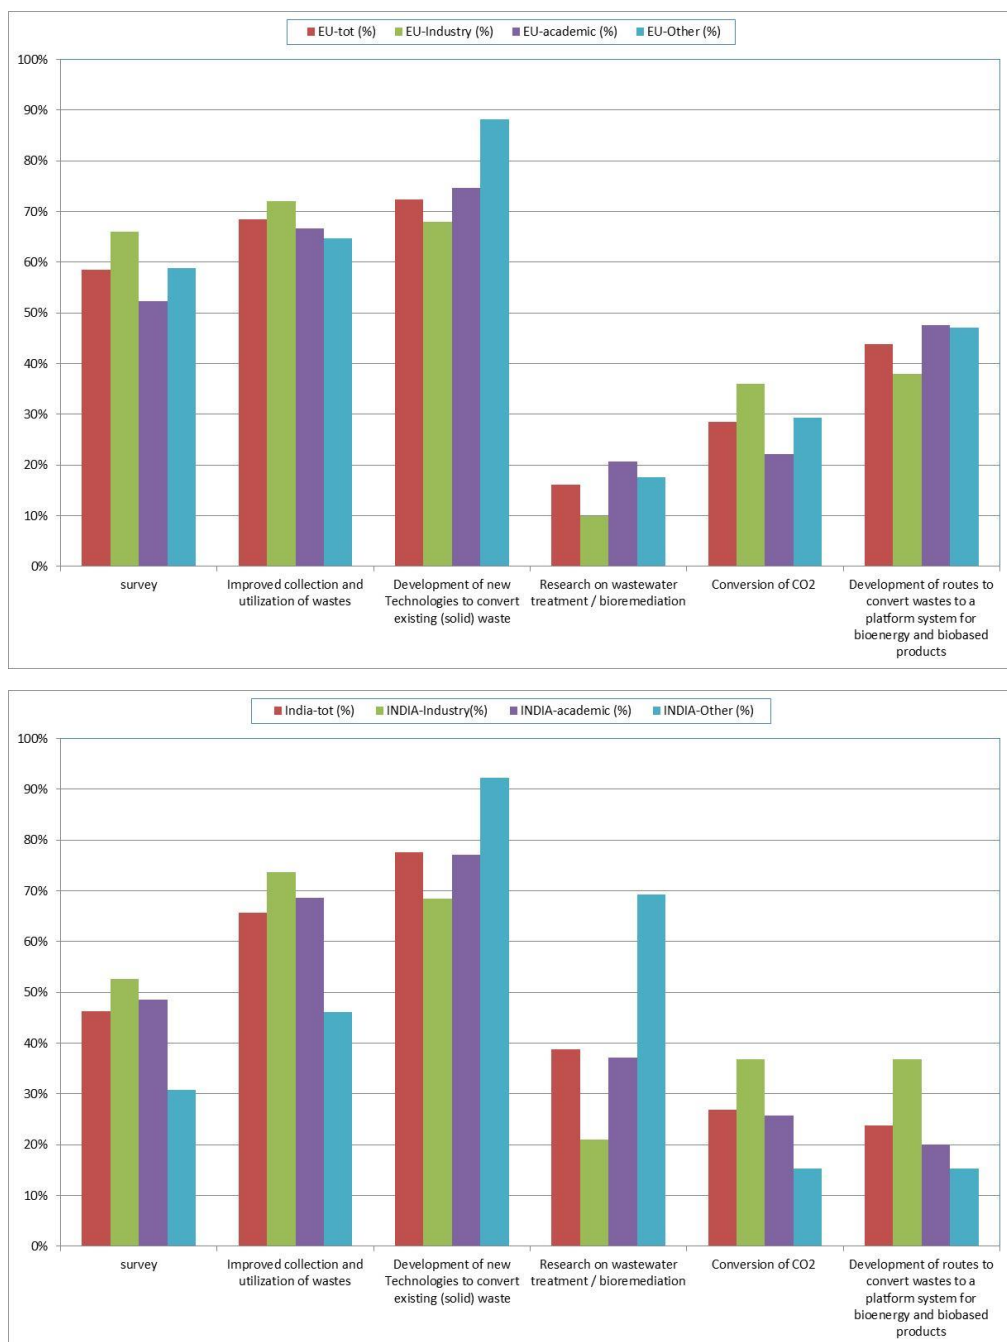

Figure SI.11: Comparison of responses to waste related survey questions by industry, academic and other sectors in EU (top) and India (bottom).



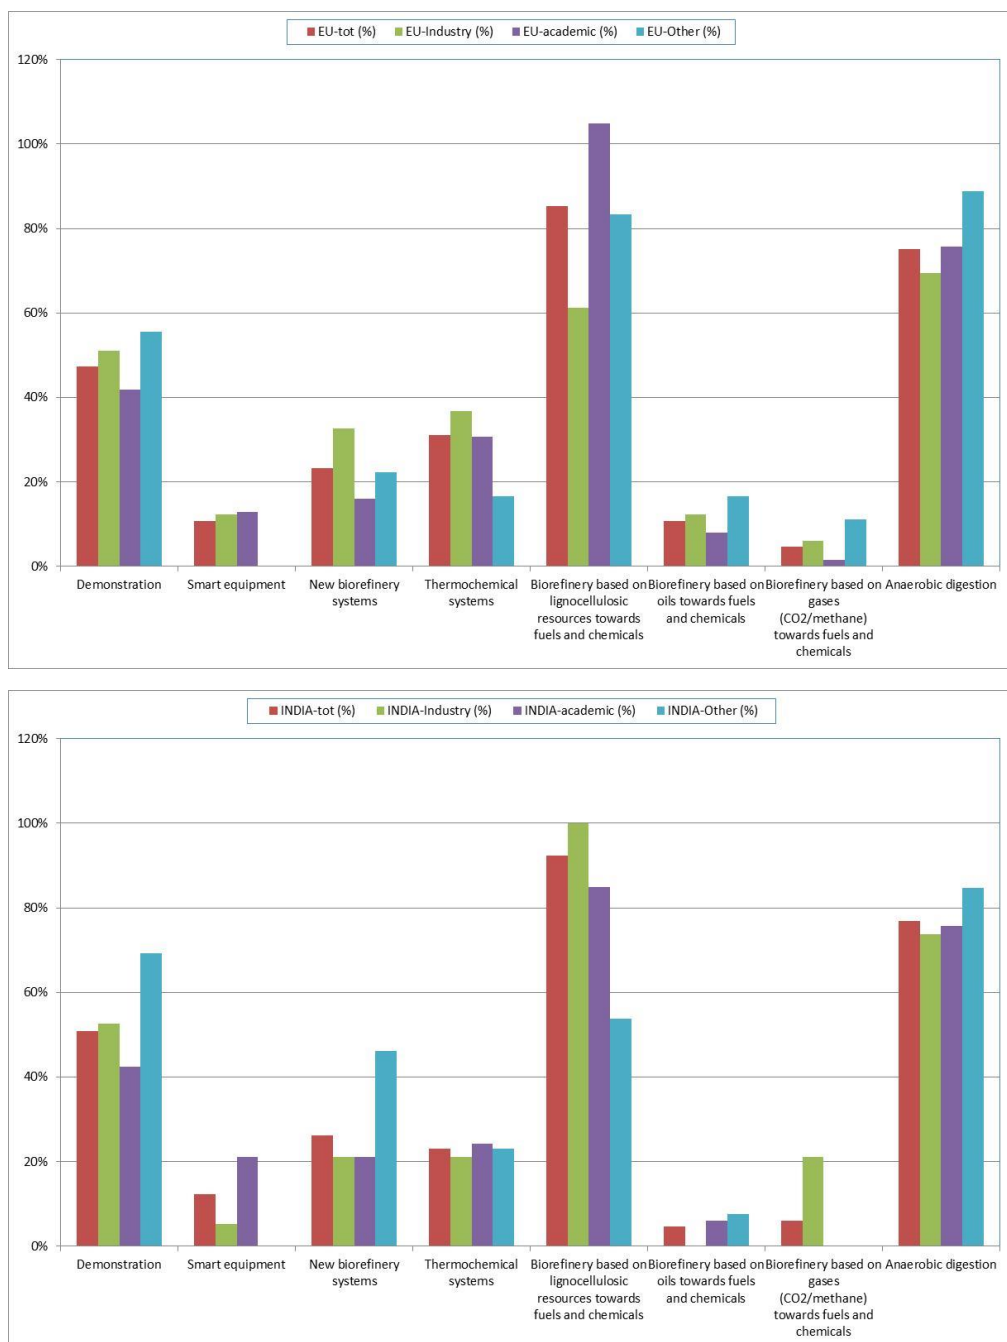

Figure SI.12: Comparison of responses to biorefinery related survey questions by industry, academic and other sectors in EU (top) and India (bottom).
